# Supplementary material for: Soil Quality Assessment after 25 Years of Sewage Sludge vs. Mineral Fertilization in a Calcareous Soil
Source: MDPI journal article supplement (doi:10.3390/land10070727), 2021-07-10
Supplement: s1 [file s1]

**Table S1** - Correlation among measured soil attributes considered for factor analysis in the 0–15 cm depth across all management treatments. Earthworms' total biomass (EW g/m<sup>2</sup>), abundance (EW i/m<sup>2</sup>), and average size (EW g/i).

|                                        | PR        | Water <sup>-50</sup> | P <sup>0</sup> <sub>0.2-0.9µm</sub> | P <sup>0</sup> <sub>&gt;0.9µm</sub> | P <sup>0</sup> <sub>0.2-0.9µm0.2</sub> | WSA      | MWD <sub>d</sub> | MWD <sub>w</sub> | Av P      | Total N   | EC       | pH        | Ext Na  | Av Zn    | Av Cu    | Av Ni    | Av Cd    | Av Pb    | SOC      | POM-C    | EW g/m <sup>2</sup> |
|----------------------------------------|-----------|----------------------|-------------------------------------|-------------------------------------|----------------------------------------|----------|------------------|------------------|-----------|-----------|----------|-----------|---------|----------|----------|----------|----------|----------|----------|----------|---------------------|
| PR                                     | 1         |                      |                                     |                                     |                                        |          |                  |                  |           |           |          |           |         |          |          |          |          |          |          |          |                     |
| Water <sup>-50</sup>                   | 0.345**   | 1                    |                                     |                                     |                                        |          |                  |                  |           |           |          |           |         |          |          |          |          |          |          |          |                     |
| P <sup>0</sup> <sub>0.2-0.9</sub>      | 0.229     | 0.764***             | 1                                   |                                     |                                        |          |                  |                  |           |           |          |           |         |          |          |          |          |          |          |          |                     |
| P <sup>0</sup> <sub>&gt;0.9</sub>      | -0.229    | -0.846***            | -0.540**                            | 1                                   |                                        |          |                  |                  |           |           |          |           |         |          |          |          |          |          |          |          |                     |
| P <sup>0</sup> <sub>0.2-0.9µm0.2</sub> | 0.253     | 0.901***             | 0.795***                            | -0.933                              | 1                                      |          |                  |                  |           |           |          |           |         |          |          |          |          |          |          |          |                     |
| WSA                                    | 0.154     | 0.395**              | 0.409**                             | -0.273                              | 0.356**                                | 1        |                  |                  |           |           |          |           |         |          |          |          |          |          |          |          |                     |
| MWD <sub>dry</sub>                     | -0.190    | -0.577**             | -0.451**                            | 0.514                               | -0.561**                               | -0.312*  | 1                |                  |           |           |          |           |         |          |          |          |          |          |          |          |                     |
| MWD <sub>wet</sub>                     | 0.267     | -0.307*              | -0.240                              | 0.280                               | -0.296*                                | -0.219   | 0.259            | 1                |           |           |          |           |         |          |          |          |          |          |          |          |                     |
| Av P                                   | -0.479**  | 0.225                | 0.206                               | -0.165                              | 0.221                                  | 0.108    | -0.096           | -0.721***        | 1         |           |          |           |         |          |          |          |          |          |          |          |                     |
| Total N                                | -0.431**  | 0.038                | 0.043                               | 0.001                               | 0.057                                  | 0.077    | 0.144            | -0.508**         | 0.837***  | 1         |          |           |         |          |          |          |          |          |          |          |                     |
| EC                                     | -0.348**  | 0.292*               | 0.128                               | -0.184                              | 0.182                                  | 0.148    | -0.015           | -0.491**         | 0.8111*** | 0.663**   | 1        |           |         |          |          |          |          |          |          |          |                     |
| pH                                     | 0.353**   | 0.174                | 0.053                               | -0.230                              | 0.160                                  | 0.103    | -0.247           | 0.432**          | -0.633*** | -0.620*** | -0.445** | 1         |         |          |          |          |          |          |          |          |                     |
| Ext Na                                 | -0.218    | -0.132               | -0.089                              | -0.048                              | 0.014**                                | -0.422** | 0.305*           | -0.180           | 0.028     | 0.187     | -0.143   | -0.119    | 1       |          |          |          |          |          |          |          |                     |
| Av Zn                                  | -0.577**  | 0.109                | 0.088                               | -0.076                              | 0.110                                  | 0.023    | 0.063            | -0.664***        | 0.960***  | 0.869***  | 0.792**  | -0.695*** | 0.179   | 1        |          |          |          |          |          |          |                     |
| Av Cu                                  | -0.602*** | 0.053                | 0.069                               | -0.015                              | 0.058*                                 | 0.018    | 0.077            | -0.669***        | 0.939***  | 0.855**   | 0.709*** | -0.679*** | 0.228   | 0.986*** | 1        |          |          |          |          |          |                     |
| Av Ni                                  | -0.529**  | 0.152                | 0.102                               | -0.138                              | 0.163                                  | -0.062   | 0.039            | -0.620***        | 0.941***  | 0.805**   | 0.863**  | -0.662**  | 0.162   | 0.952*** | 0.915*** | 1        |          |          |          |          |                     |
| Av Cd                                  | -0.635*** | -0.145               | 0.022                               | 0.199                               | -0.117                                 | -0.033   | 0.161            | -0.619***        | 0.770***  | 0.728***  | 0.468**  | -0.638*** | 0.322** | 0.853*** | 0.913*** | 0.745*** | 1        |          |          |          |                     |
| Av Pb                                  | -0.605*** | -0.065               | 0.044                               | 0.006                               | 0.040                                  | -0.082   | 0.089            | -0.525**         | 0.702***  | 0.635**   | 0.429**  | -0.461**  | 0.414** | 0.763*** | 0.818*** | 0.721*** | 0.808*** | 1        |          |          |                     |
| SOC                                    | -0.470**  | 0.032***             | -0.067                              | -0.053                              | 0.040                                  | -0.060   | 0.024            | -0.617           | 0.892***  | 0.791     | 0.801*** | -0.693*** | 0.135   | 0.917*** | 0.880*** | 0.937*** | 0.738*** | 0.657**  | 1        |          |                     |
| POM-C                                  | -0.338*   | -0.113**             | -0.374                              | -0.003**                            | -0.124                                 | -0.239   | 0.015            | -0.391           | 0.472     | 0.541     | 0.349**  | -0.570**  | 0.451** | 0.566**  | 0.562**  | 0.552**  | 0.511**  | 0.413**  | 0.684**  | 1        |                     |
| EW g/m <sup>2</sup>                    | 0.313*    | 0.008                | -0.004                              | 0.068                               | -0.069                                 | -0.021   | 0.103            | 0.522            | -0.404    | -0.425**  | -0.248   | 0.238     | -0.187  | -0.383** | -0.402** | -0.379** | -0.443** | -0.383** | -0.348** | -0.347** | 1                   |
| EW g/i                                 | 0.273*    | -0.299*              | -0.073                              | 0.350                               | -0.275*                                | -0.110   | 0.130            | 0.248            | -0.316    | -0.390**  | -0.371** | 0.034     | -0.081  | -0.315** | -0.294*  | -0.339*  | -0.226   | -0.156   | -0.268   | -0.308** | 0.712***            |

\*: Correlation is significant at  $p < 0.10$ , \*\*: Correlation is significant at  $p < 0.05$ , \*\*\*: Correlation is significant at  $p < 0.001$

**Table S2** - Correlation among measured soil attributes considered for factor analysis in the 15-30 cm depth across all management treatments.

|                    | P $\bar{O}_{>0.2}$ | Av P      | EC        | pH        | Ext K   | Ext Na  | SOC      | POM-C |
|--------------------|--------------------|-----------|-----------|-----------|---------|---------|----------|-------|
| P $\bar{O}_{>0.2}$ | 1                  |           |           |           |         |         |          |       |
| Av P               | -0.080             | 1         |           |           |         |         |          |       |
| EC                 | -0.135             | 0.953***  | 1         |           |         |         |          |       |
| pH                 | 0.055              | -0.877*** | -0.878*** | 1         |         |         |          |       |
| Ext K              | -0.048             | -0.052    | -0.080    | -0.233    | 1       |         |          |       |
| Ext Na             | -0.140             | 0.187     | 0.146     | -0.433**  | 0.471** | 1       |          |       |
| SOC                | 0.215              | 0.784***  | 0.790***  | -0.708*** | -0.117  | 0.217   | 1        |       |
| POM-C              | 0.391              | 0.534***  | 0.610***  | -0.501**  | 0.031   | 0.071   | 0.635*** | 1     |
| MBC                | 0.033**            | 0.330*    | 0.351**   | -0.413**  | 0.308*  | 0.494** | 0.246    | 0.184 |

\*: Correlation is significant at  $p < 0.10$ , \*\*: Correlation is significant at  $p < 0.05$ , \*\*\*: Correlation is significant at  $p < 0.001$
